# Supplementary material for: A novel high performing multiplex immunoassay Multi-HTLV for serological confirmation and typing of HTLV infections
Source: PubMed Central journal article supplement (PMC8584783; doi:10.1371/journal.pntd.0009925), 2021-11-01

A.

| Patient ID | Sampling Date | PCR Result | Proviral Load | INNO-LIA Scoring |               |               |                |            |             | Sum INNO-LIA scoring | INNO-LIA Result | Multi-HTLV intensity |                |               |                |            |             | Sum Multi-HTLV intensities | Multi-HTLV Result |              |
|------------|---------------|------------|---------------|------------------|---------------|---------------|----------------|------------|-------------|----------------------|-----------------|----------------------|----------------|---------------|----------------|------------|-------------|----------------------------|-------------------|--------------|
|            |               |            |               | GP21-I/II CONF   | P19-I/II CONF | P24-I/II CONF | GP46-I/II CONF | P19-I TYPE | GP46-I TYPE |                      |                 | GP46-II TYPE         | GP21-I/II CONF | P19-I/II CONF | GP46-I/II CONF | P19-I TYPE | GP46-I TYPE |                            |                   | GP46-II TYPE |
| 108        | 19/06/91      | HTLV-1     | 2172          | 3                | 2             | 2             | 2              | 0          | 3           | 0                    | 12              | HTLV-1               | 47,9           | 83,6          | 95,4           | 48,1       | 99,0        | 1,0                        | 375,0             | HTLV-1       |
|            | 16/04/93      | HTLV-1     | 6589          | 3                | 3             | 2             | 2              | 0          | 3           | 0,5                  | 13,5            | HTLV-1               | 75,3           | 101,5         | 87,7           | 60,8       | 91,1        | 0,4                        | 416,8             | HTLV-1       |
|            | 10/04/95      | HTLV-1     | 9962          | 3                | 3             | 3             | 2              | 0          | 3           | 0,5                  | 14,5            | HTLV-1               | 56,5           | 95,3          | 93,5           | 87,1       | 92,2        | 3,0                        | 427,6             | HTLV-1       |
|            | 04/02/98      | HTLV-1     | 17110         | 3                | 3             | 3             | 2              | 0          | 3           | 0                    | 14              | HTLV-1               | 80,4           | 90,2          | 83,1           | 64,4       | 87,3        | 1,5                        | 406,9             | HTLV-1       |
|            | 07/06/00      | HTLV-1     | 8709          | 4                | 3             | 3             | 3              | 0          | 3           | 0                    | 16              | HTLV-1               | 80,3           | 85,5          | 83,2           | 39,1       | 83,7        | 3,4                        | 375,1             | HTLV-1       |
|            | 18/09/02      | HTLV-1     | 8200          | 4                | 3             | 3             | 3              | 0          | 3           | 0                    | 16              | HTLV-1               | 83,9           | 86,6          | 81,2           | 24,5       | 82,0        | 3,7                        | 361,9             | HTLV-1       |
| 572        | 01/07/92      | HTLV-2     | 1             | 3                | 0             | 2             | 2              | 0          | 0           | 2                    | 9               | HTLV-2               | 51,4           | 29,8          | 53,3           | 4,9        | 3,8         | 47,6                       | 190,9             | HTLV-2       |
|            | 21/10/93      | HTLV-2     | 24            | 3                | 0             | 2             | 2              | 0          | 0           | 2                    | 9               | HTLV-2               | 85,0           | 12,7          | 39,3           | 0,7        | 2,9         | 38,9                       | 179,5             | HTLV-2       |
|            | 04/04/96      | HTLV-2     | 2042          | 3                | 0,5           | 2             | 2              | 0          | 0           | 2                    | 9,5             | HTLV-2               | 82,0           | 22,4          | 98,3           | 2,4        | 3,1         | 93,8                       | 302,1             | HTLV-2       |
|            | 04/08/98      | HTLV-2     | 7             | 3                | 0,5           | 2             | 2              | 0          | 0           | 3                    | 10,5            | HTLV-2               | 85,2           | 28,0          | 96,1           | 1,9        | 3,2         | 89,9                       | 304,4             | HTLV-2       |
|            | 10/02/00      | HTLV-2     | 35576         | 3                | 0             | 2             | 2              | 0          | 0           | 2                    | 9               | HTLV-2               | 94,8           | 26,8          | 96,3           | 2,1        | 2,6         | 91,4                       | 314,0             | HTLV-2       |
|            | 22/07/02      | HTLV-2     | 184           | 3                | 0             | 2             | 2              | 0          | 0           | 2                    | 9               | HTLV-2               | 91,1           | 33,3          | 99,3           | 5,6        | 4,2         | 95,3                       | 328,8             | HTLV-2       |
| 1204       | 23/01/91      | HTLV-2     | 32            | 3                | 2             | 2             | 2              | 0          | 0           | 2                    | 11              | HTLV-2               | 75,6           | 56,6          | 42,9           | 1,6        | 1,6         | 40,4                       | 218,7             | HTLV-2       |
|            | 02/10/93      | HTLV-2     | 29            | 3                | 2             | 2             | 2              | 0          | 0           | 2                    | 11              | HTLV-2               | 81,9           | 35,2          | 40,8           | 1,4        | 1,8         | 41,6                       | 202,6             | HTLV-2       |
|            | 07/10/95      | HTLV-2     | 2             | 3                | 2             | 2             | 2              | 0          | 0           | 2                    | 11              | HTLV-2               | 88,3           | 52,7          | 56,8           | 7,0        | 2,6         | 63,9                       | 271,2             | HTLV-2       |
|            | 03/05/98      | HTLV-2     | 333           | 3                | 2             | 2             | 2              | 0          | 0           | 2                    | 11              | HTLV-2               | 83,0           | 44,8          | 39,7           | 7,0        | 4,5         | 41,0                       | 219,9             | HTLV-2       |
|            | 02/12/02      | HTLV-2     | 18            | 3                | 2             | 2             | 2              | 0          | 0           | 2                    | 11              | HTLV-2               | 93,7           | 31,1          | 16,1           | 4,6        | 3,7         | 40,0                       | 189,3             | HTLV-2       |

B.

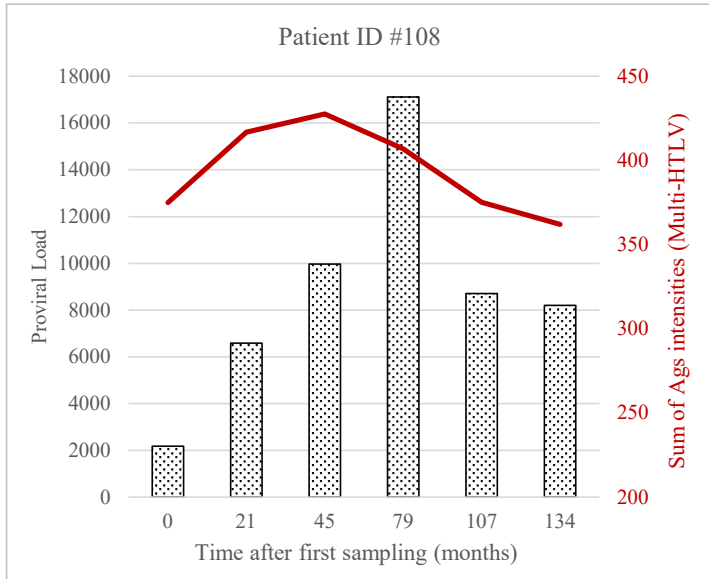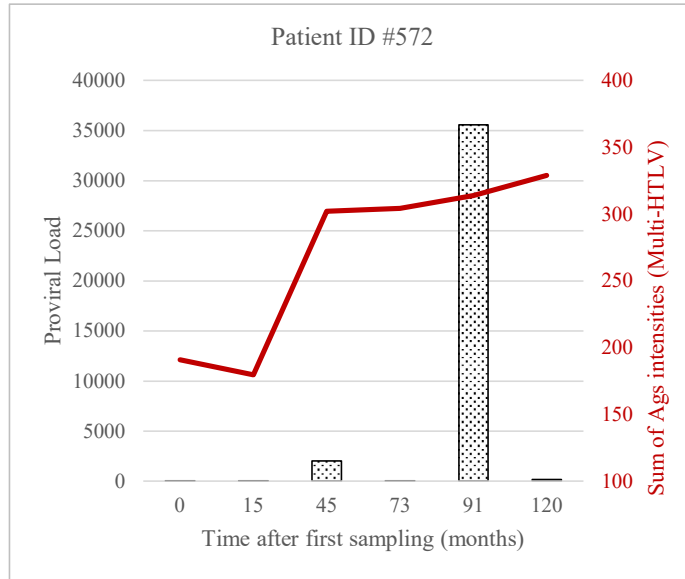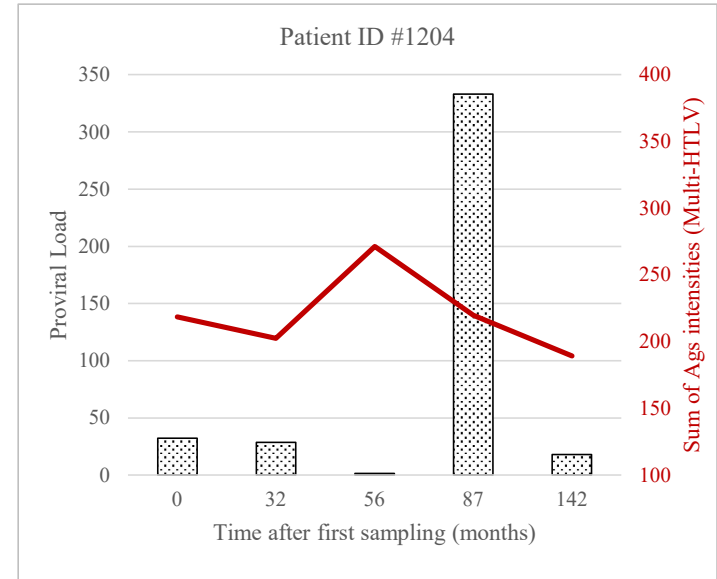

Supplement: pntd.0009925.s004.pdf [file pntd.0009925.s004.pdf]
