# Supplementary material for: A novel high performing multiplex immunoassay Multi-HTLV for serological confirmation and typing of HTLV infections
Source: PubMed Central journal article supplement (PMC8584783; doi:10.1371/journal.pntd.0009925), 2021-11-01

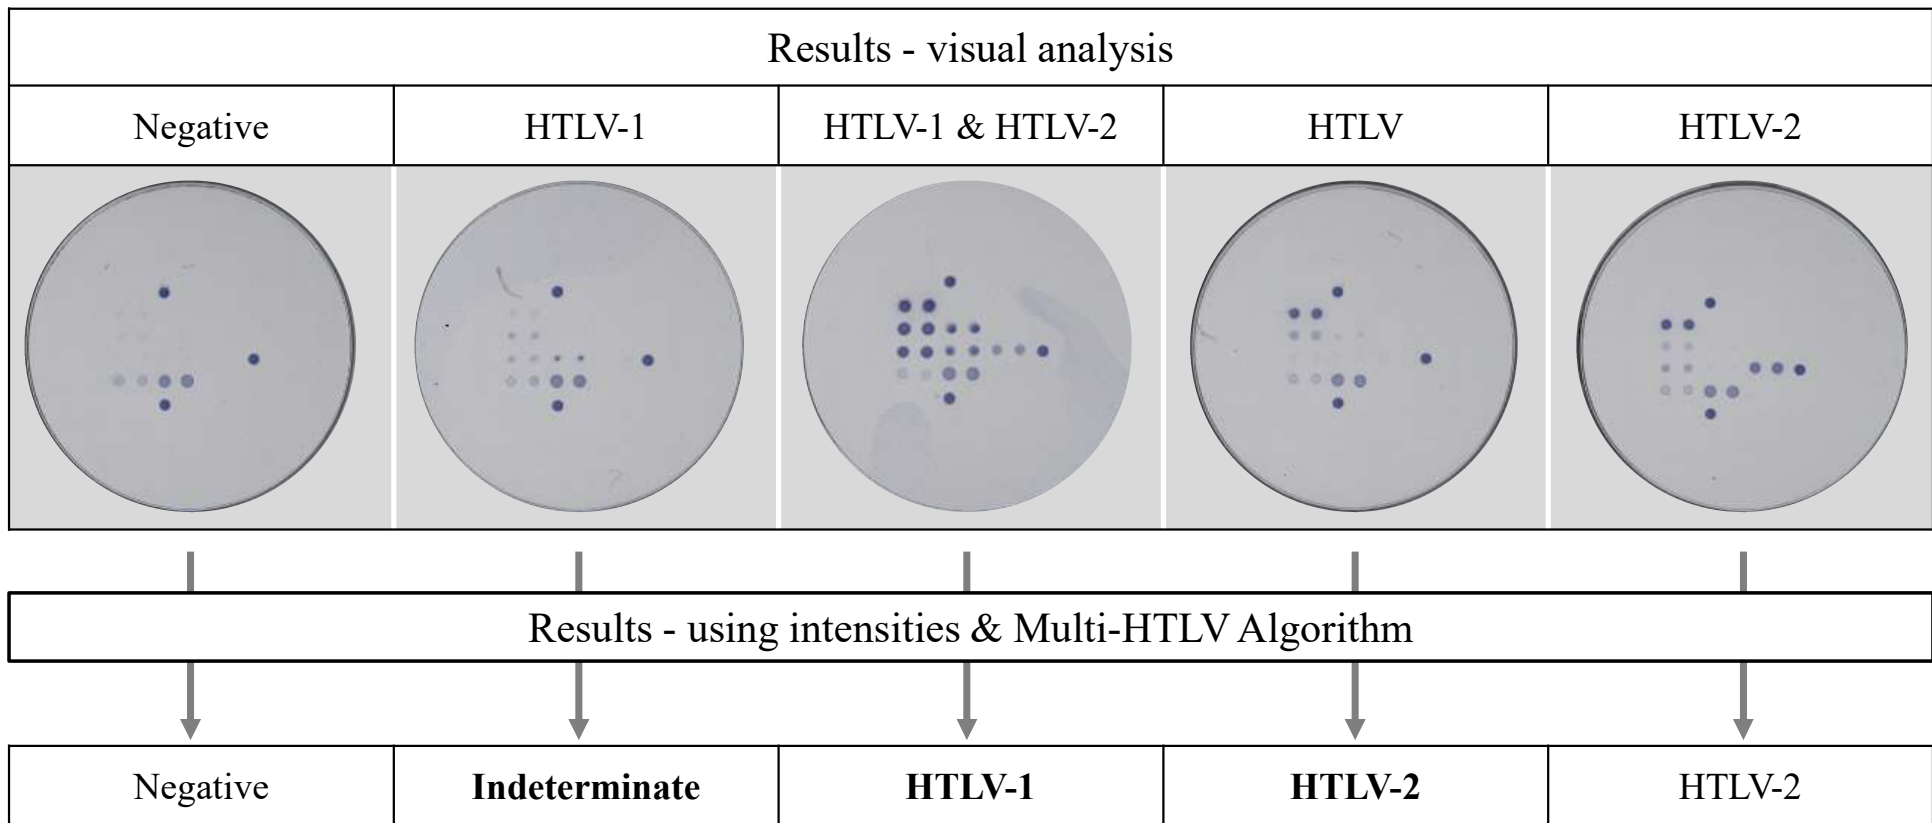

Supplement: pntd.0009925.s003.pdf [file pntd.0009925.s003.pdf]
